# Supplementary material for: Evaluating the Impact of Practical Training: A Study on Satisfaction and Drug Knowledge among Pharmacy Students
Source: MDPI journal article supplement (doi:10.3390/pharmacy12020069), 2024-04-16
Supplement: s1 [file s1]

## Supplementary Material

Table S1. Drug names listed in the questionnaire (categorised by sales order)

| Drug name                      | Sales (million yen) | Quantity (10,000 pieces) |
|--------------------------------|---------------------|--------------------------|
| Esomeprazole magnesium hydrate | 75998               | 58200                    |
| Sitagliptin phosphate hydrate  | 71018               | 52435                    |
| Rosuvastatin calcium           | 67441               | 104461                   |
| Pregabalin                     | 66328               | 74175                    |
| Eldecalcitol                   | 49905               | 51578                    |
| Clopidogrel sulfate            | 43788               | 38699                    |
| Olmesartan medoxomil           | 43600               | 50614                    |
| Celecoxib                      | 38202               | 54350                    |
| Lansoprazole                   | 32736               | 71510                    |
| Febuxostat                     | 29158               | 61745                    |
| Telmisartan                    | 28628               | 36558                    |
| Levocetirizine hydrochloride   | 28357               | 49101                    |
| Ethyl Icosapentate             | 27999               | 50214                    |
| Silodosin                      | 26342               | 36171                    |
| Candesartan cilexetil          | 22783               | 37909                    |
| Cilostazol                     | 21111               | 36624                    |
| Olopatadine hydrochloride      | 20434               | 55448                    |
| Bepotastine besilate           | 19443               | 43472                    |
| Rebamipide                     | 19281               | 176231                   |
| Pranlukast hydrate             | 19183               | 45526                    |
| Clarithromycin                 | 18154               | 36646                    |
| Pravastatin sodium             | 16439               | 44478                    |
| Metformin hydrochloride        | 16202               | 156706                   |
| Magnesium oxide                | 16187               | 303816                   |
| Nifedipine                     | 14698               | 75761                    |
| Zolpidem tartrate              | 13921               | 39132                    |
| Loxoprofen sodium hydrate      | 11928               | 117552                   |
| Rivaroxaban                    | 54675               | 11821                    |
| Ezetimibe                      | 46864               | 25291                    |
| Tacrolimus hydrate             | 46065               | 7325                     |
| Vonoprazan fumarate            | 41848               | 23035                    |
| Memantine hydrochloride        | 41202               | 13737                    |
| Limaprost alfadex              | 31466               | 86426                    |
| Galantamine hydrobromide       | 23456               | 13008                    |
| Vildagliptin                   | 20968               | 26177                    |
| Dutasteride                    | 20714               | 9836                     |
| Escitalopram oxalate           | 19638               | 9075                     |

|                                 |       |       |
|---------------------------------|-------|-------|
| Mirtazapine                     | 18372 | 10764 |
| Lubiprostone                    | 18130 | 11254 |
| Aripiprazole                    | 16148 | 13866 |
| Lamotrigine                     | 15765 | 11253 |
| Tolvaptan                       | 30423 | 1968  |
| Enzalutamide                    | 21733 | 923   |
| Bicalutamide                    | 21499 | 4550  |
| Dasatinib                       | 20567 | 258   |
| Osimertinib mesilate            | 16572 | 69    |
| Nilotinib hydrochloride hydrate | 14279 | 364   |
| Alectinib hydrochloride         | 13814 | 209   |
| Tadalafil                       | 12890 | 4374  |
| Bosentan hydrate                | 12407 | 276   |

---

From the NDB's top 100 drug sales data, 50 drugs were randomly selected for the drug name knowledge survey. These are the 50 drugs that were used.
